# Supplementary material for: BiOBr–carbon nitride heterojunctions: synthesis, enhanced activity and photocatalytic mechanism
Source: Royal Society of Chemistry journal article supplement (doi:10.1039/c2jm34778d), 2012-01-01
Supplement: c2jm34778d.pdf [file c2jm34778d.pdf]

## Supplementary Information

### BiOBr/carbon nitride heterojunctions: synthesis, enhanced activity and photocatalytic mechanism

Jie Fu, Yanlong Tian, Binbin Chang, Fengna Xi and Xiaoping Dong\*

Department of Chemistry, School of Sciences, Zhejiang Sci-Tech University, 5 Second Avenue, Xiasha Higher Education Zone, Hangzhou, 310018, China.

Fax: +86 0571 86843653; Tel: +86 0571 86843228;

E-mail: [xpdong@zstu.edu.cn](mailto:xpdong@zstu.edu.cn)

#### Details for the preparation of 0.5C<sub>3</sub>N<sub>4</sub>-0.5TiO<sub>2</sub> and 0.5BiOBr-0.5TiO<sub>2</sub> heterojunctions

The 0.5C<sub>3</sub>N<sub>4</sub>-0.5TiO<sub>2</sub> sample was synthesized as follows: 0.6 g of TiO<sub>2</sub> particulates (P25, Degussa) were finely ground with 0.6 g of C<sub>3</sub>N<sub>4</sub>, and then this mixture was heated in a crucible at 400 °C for 2 h. After cooling to room temperature, the 0.5C<sub>3</sub>N<sub>4</sub>-0.5TiO<sub>2</sub> heterojunction was obtained. For preparing the 0.5BiOBr-0.5TiO<sub>2</sub> photocatalyst, 0.6 g of TiO<sub>2</sub> (P25) powder and 0.24 g of KBr solid were added to 50 mL of water and ultrasonicated for 30 min to get a uniform suspension. Meanwhile, 0.97 g of Bi(NO<sub>3</sub>)<sub>3</sub>·5H<sub>2</sub>O was dissolved in glacial acetic acid to obtain a clear solution. The resulting solution was added rapidly to the suspension and subsequently stirred for 30 min at room temperature. After aging for 3 h, the resulting precipitate was collected by centrifugation, washed thoroughly with water, and finally dried at 70 °C.

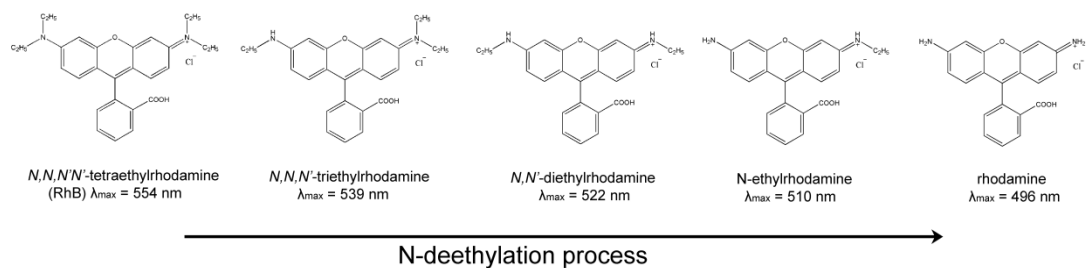

**Fig. S1** The stepwise *N*-deethylation of RhB during the photocatalytic process.

Four main de-ethylated intermediates and their corresponding characteristic absorption bands are listed here.

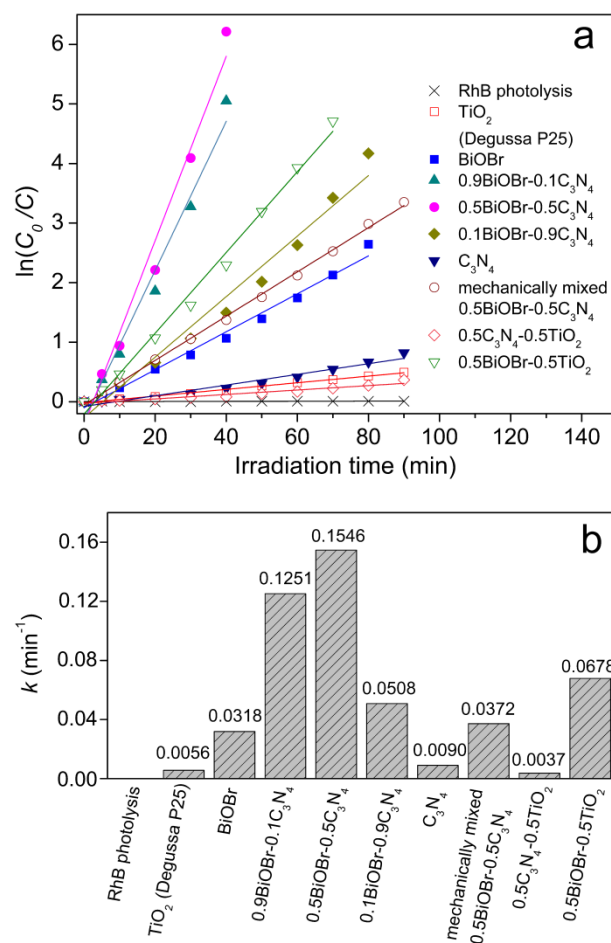

**Fig. S2** (a) first-order kinetics plot for the visible light induced photodegradation of RhB over various photocatalysts, and (b) their corresponding rate constants ( $k$ ).

The first-order model,  $\ln(C_0/C) = kt$ , was applied to fit the experimental data, where  $C_0$  and  $C$  are the concentrations of RhB solution at times 0 (after stirring in the dark for 60 min) and  $t$ , respectively, and  $k$  is the first-order rate constant.

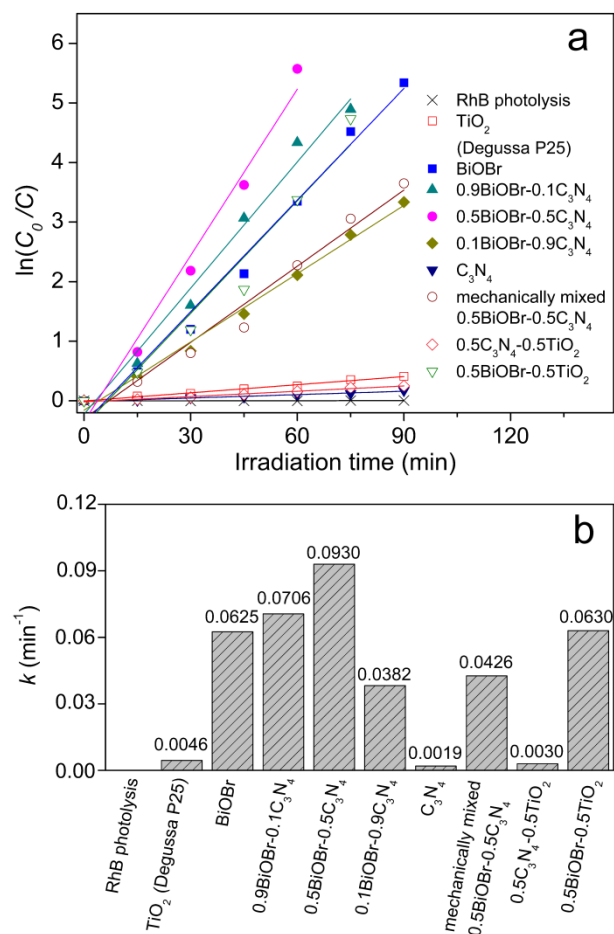

**Fig. S3** (a) first-order kinetics plot for the degradation of RhB over various photocatalysts under indoor light irradiation, and (b) their corresponding rate constants ( $k$ ).

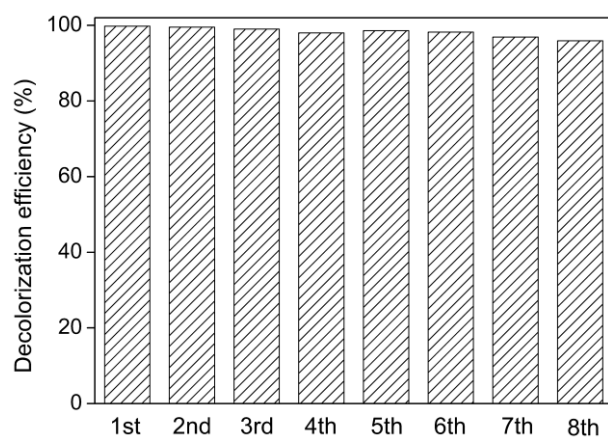

**Fig. S4** The decolorization efficiency of RhB using 0.5BiOBr-0.5C<sub>3</sub>N<sub>4</sub> heterojunction after 150 min of indoor light irradiation in each cycle.

The decolorization efficiency was estimated as:  $\eta (\%) = (A_0 - A)/A_0 \times 100\%$

Where  $A_0$  is the equilibrium absorbance of RhB solution at 554 nm (after stirring in the dark for 60 min), and  $A$  is the absorbance of final solution at 496 nm (after indoor light irradiation for 150 min).

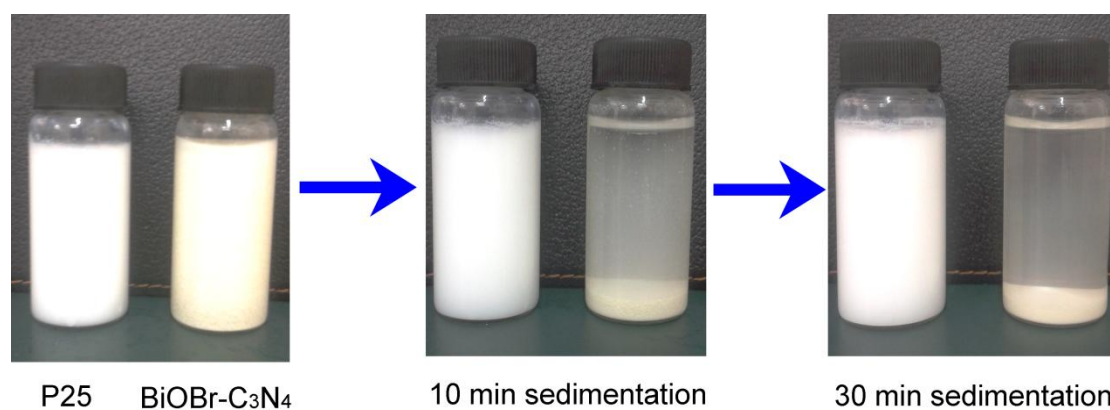

**Fig. S5** Sedimentation of TiO<sub>2</sub> nanocatalyst (P25) and 0.5BiOBr-0.5C<sub>3</sub>N<sub>4</sub> heterojunction in water.

It is clear that most of 0.5BiOBr-0.5C<sub>3</sub>N<sub>4</sub> particles have settled within 10 min and a nearly complete separation can be realized after 30 min by a simple sedimentation. On the contrary, in the case of P25, almost no changes can be observed.

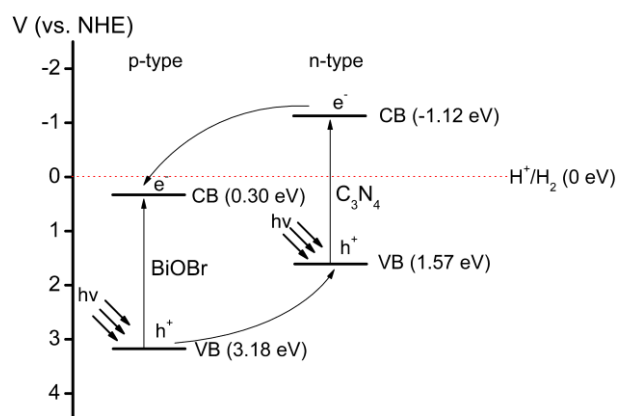

**Fig. S6** Proposed energy levels of BiOBr and C<sub>3</sub>N<sub>4</sub> and the scheme for the separation and transport of photogenerated charges at the interface of BiOBr-C<sub>3</sub>N<sub>4</sub> heterojunctions.

Due to the well-aligned straddling band-structures of BiOBr-C<sub>3</sub>N<sub>4</sub>, the excited electrons would be concentrated in the CB of BiOBr, and the holes would be collected by the VB of C<sub>3</sub>N<sub>4</sub>. This effectively inhibits the recombination of photogenerated electrons-holes pairs.

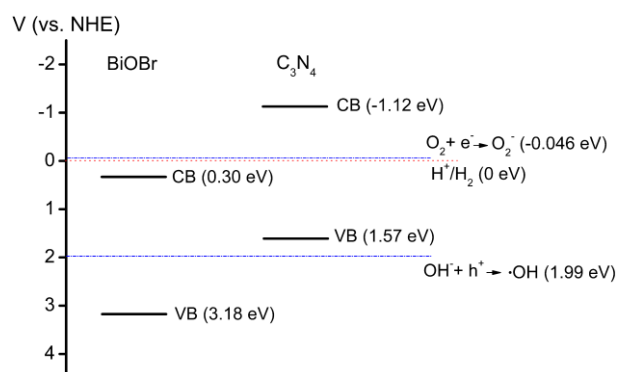

**Fig. S7** Proposed energy levels of BiOBr and C<sub>3</sub>N<sub>4</sub> compare with the standard redox potentials of  $\cdot\text{OH}/\text{OH}^-$  and  $\text{O}_2/\text{O}_2^-$ .

Obviously, the excited electrons in the CB potential of BiOBr are not negative enough to reduce the  $\text{O}_2$  molecule, and holes in the VB of C<sub>3</sub>N<sub>4</sub> are not positive to oxidize  $\text{OH}^-$ . Thus, both the photogenerated electrons in BiOBr and holes in C<sub>3</sub>N<sub>4</sub> cannot bring any hydroxyl radicals to the photocatalytic system.

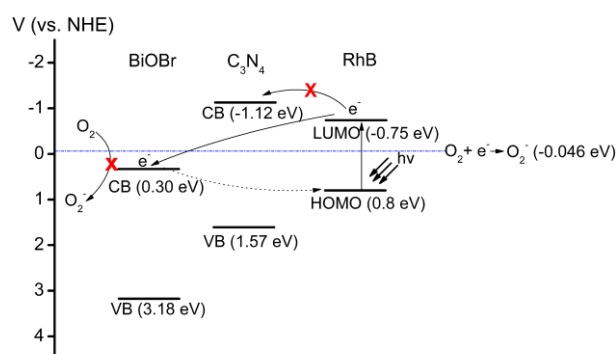

**Fig. S8** Proposed routes for the transfer of excited electrons from RhB.

Since the CB of  $C_3N_4$  is more negative than the LUMO of RhB, the excited electrons cannot transfer to the CB of  $C_3N_4$ . Moreover, even though a successful transfer of electrons from the LUMO of RhB to the CB of BiOBr would take place, these electrons cannot further reduce  $O_2$  to form  $O_2^-$  species, as described in Figure S7. As a result, these transferred electrons would return to the HOMO of RhB, as marked by the dotted line (black). These exclude the possibility that the dye-sensitised photocatalysis would contribute to the degradation of RhB in the present BiOBr- $C_3N_4$  system.
